# Supplementary material for: Identification and characterization of microRNAs involved in ascidian larval metamorphosis
Source: PubMed Central journal article supplement (PMC5831862; doi:10.1186/s12864-018-4566-4), 2018-03-01
Supplement: 12864_2018_4566_MOESM3_ESM.pdf [file 12864_2018_4566_MOESM3_ESM.pdf]

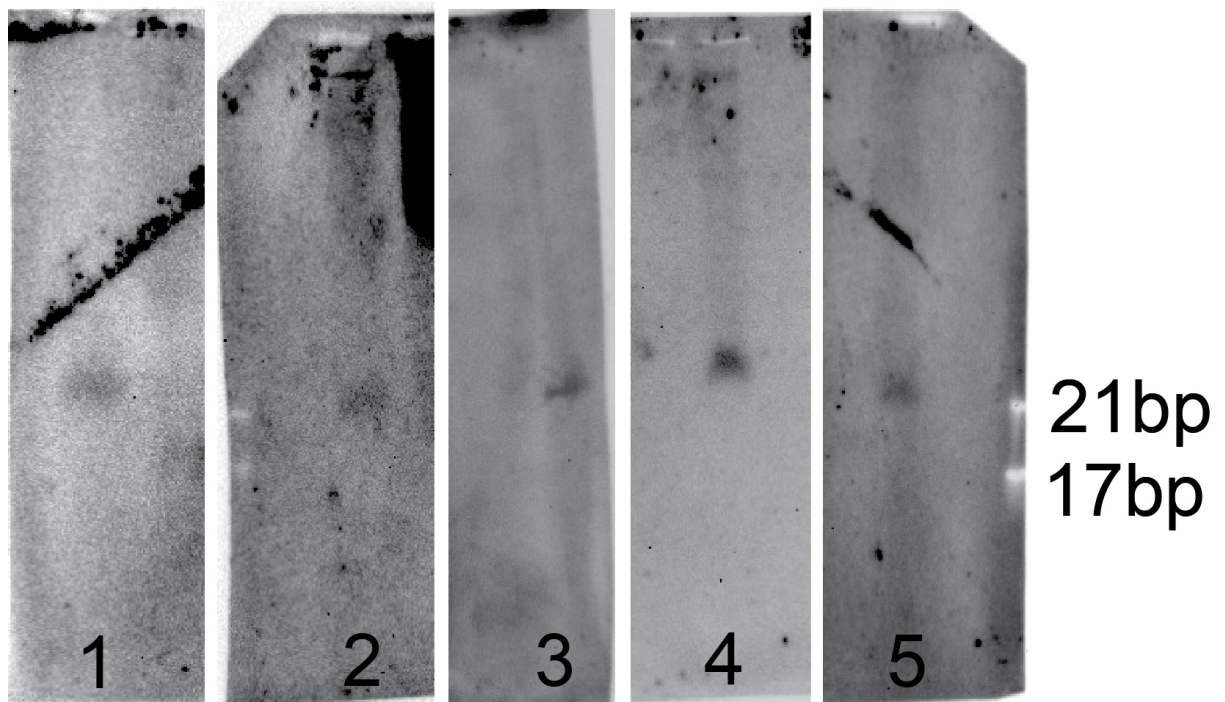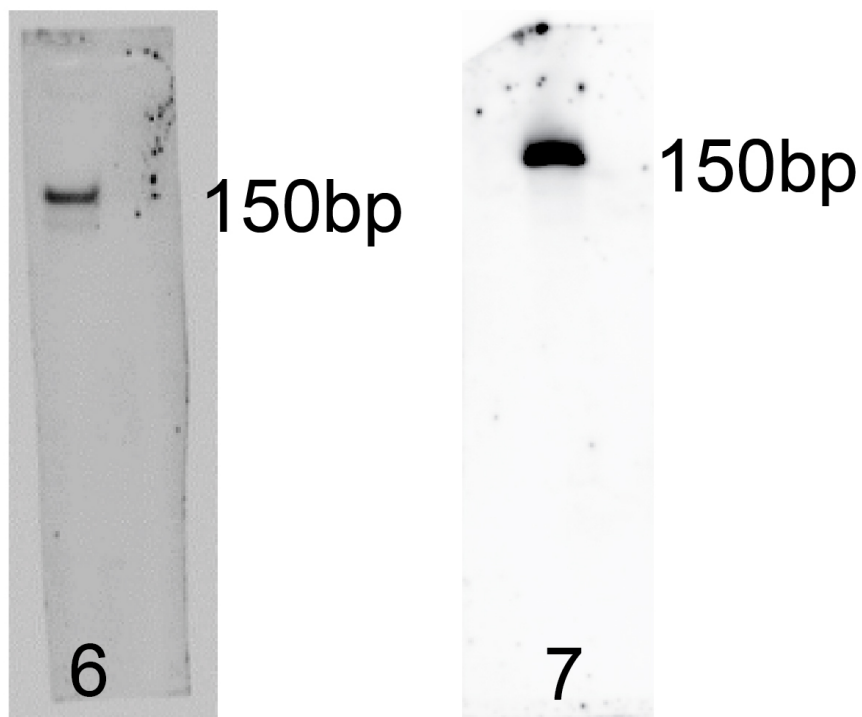

**Figure S1. Original images of northern blotting used in Figure 5.**

Lane1: *csa-miR-4018a*; Lane2: *csa-miR-4018b*; Lane3: *csa-miR-4000f*; Lane4: *csa-miR-4040*; Lane5: *csa-miR-4086*. The U6 snRNA served as the loading control. Lane6: U6 using total RNA extracted from adult; Lane7: U6 using total RNA extracted from embryos.
