# Supplementary material for: Identification and characterization of microRNAs involved in ascidian larval metamorphosis
Source: PubMed Central journal article supplement (PMC5831862; doi:10.1186/s12864-018-4566-4), 2018-03-01
Supplement: 12864_2018_4566_MOESM4_ESM.pdf [file 12864_2018_4566_MOESM4_ESM.pdf]

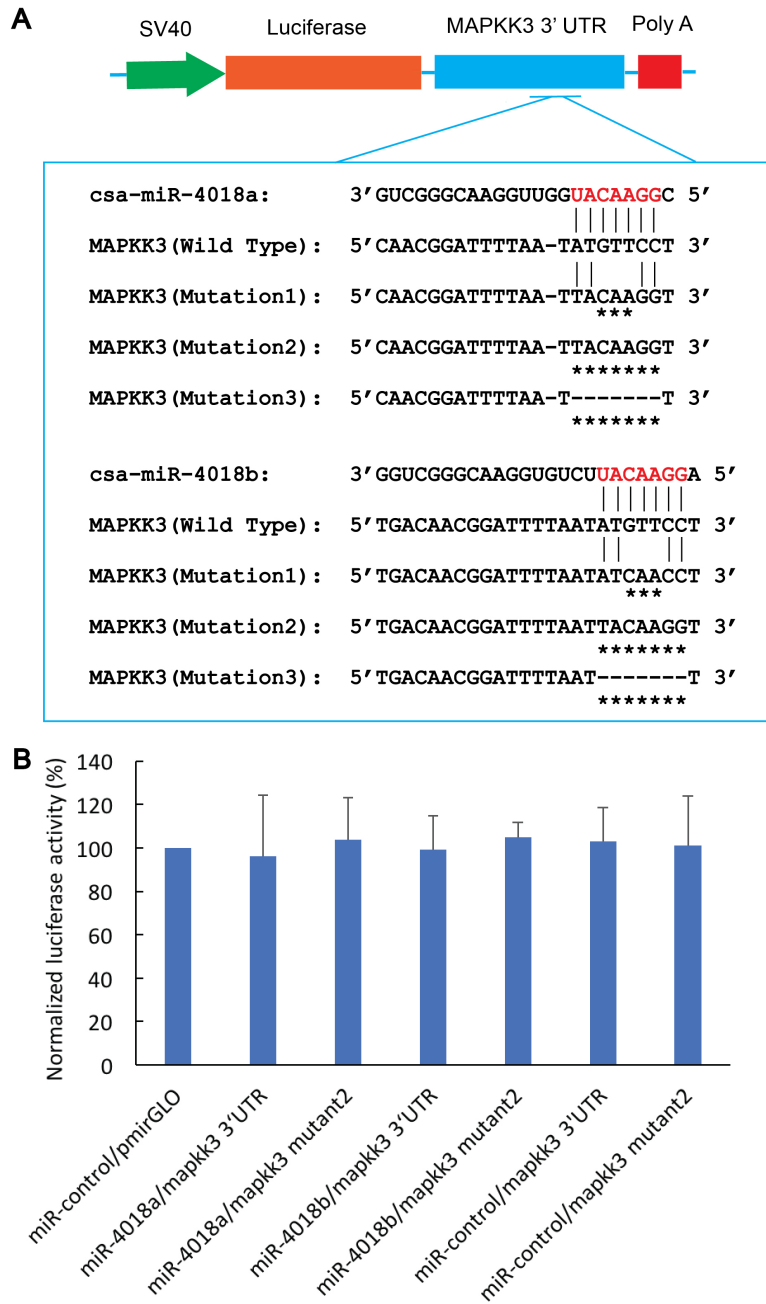

**Figure S2. Validation of interaction between miR-4018a, or miR-4018b and *Mapkk3* 3'UTR.** (A) Schema of the luciferase reporter constructs carrying of target genes 3'UTR used in the luciferase assays. Sequence alignments of miR-4018a or miR-4018b and their predicted target gene *Mapkk3* 3' UTR or *Mapkk3* 3'UTR mutants were displayed in the blue box. Asterisks under letters indicate the mutant nucleotide in the *Mapkk3* 3'UTR mutant constructs. (B) Relative luciferase activity in HEK293T cells co-transfected with pmirGLO-*Mapkk3* 3'UTR or pmirGLO-*Mapkk3*-3'UTR mutant, or the empty vector pmirGLO and either csa-miR-4018a/b mimics, or miR-control. The firefly luciferase values were normalized for transfection with *Renilla* luciferase activity.
